# Supplementary material for: Initiating disease-modifying treatments in multiple sclerosis: Measuring the decision process using decisional conflict and decisional regret scales
Source: PubMed Central journal article supplement (PMC6393834; doi:10.1177/2055217319833006), 2019-02-27
Supplement: Supplemental_Material.pdf [file Supplemental_Material.pdf]

## Appendix 1. Questionnaires

### 1.1 Demographic questionnaire

|                                                             |                                                                                                                                                                                                                                                                                                                                                                                                                                                                                                                                                                                                                                                                                                                                                                                                                                                                                                                                                                                                                                                                                                                                                                                                                        |                                    |                                             |                                                                |                                           |                                                                   |                                                        |                                                         |                                                             |                                                                 |                                                           |                                                               |                                                   |                                                         |                                                        |                                      |                                                             |                                                                            |
|-------------------------------------------------------------|------------------------------------------------------------------------------------------------------------------------------------------------------------------------------------------------------------------------------------------------------------------------------------------------------------------------------------------------------------------------------------------------------------------------------------------------------------------------------------------------------------------------------------------------------------------------------------------------------------------------------------------------------------------------------------------------------------------------------------------------------------------------------------------------------------------------------------------------------------------------------------------------------------------------------------------------------------------------------------------------------------------------------------------------------------------------------------------------------------------------------------------------------------------------------------------------------------------------|------------------------------------|---------------------------------------------|----------------------------------------------------------------|-------------------------------------------|-------------------------------------------------------------------|--------------------------------------------------------|---------------------------------------------------------|-------------------------------------------------------------|-----------------------------------------------------------------|-----------------------------------------------------------|---------------------------------------------------------------|---------------------------------------------------|---------------------------------------------------------|--------------------------------------------------------|--------------------------------------|-------------------------------------------------------------|----------------------------------------------------------------------------|
| <b><u>What is your gender?</u></b>                          | 1. Male <input type="checkbox"/>                                                                                                                                                                                                                                                                                                                                                                                                                                                                                                                                                                                                                                                                                                                                                                                                                                                                                                                                                                                                                                                                                                                                                                                       | 2. Female <input type="checkbox"/> |                                             |                                                                |                                           |                                                                   |                                                        |                                                         |                                                             |                                                                 |                                                           |                                                               |                                                   |                                                         |                                                        |                                      |                                                             |                                                                            |
| <b><u>What is your age?</u></b>                             | 1. 18 to 24 <input type="checkbox"/><br>2. 25 to 34 <input type="checkbox"/><br>3. 35 to 44 <input type="checkbox"/><br>4. 45 to 54 <input type="checkbox"/><br>5. 55 to 64 <input type="checkbox"/><br>6. 65 to 75 <input type="checkbox"/><br>7. 75 or older <input type="checkbox"/>                                                                                                                                                                                                                                                                                                                                                                                                                                                                                                                                                                                                                                                                                                                                                                                                                                                                                                                                |                                    |                                             |                                                                |                                           |                                                                   |                                                        |                                                         |                                                             |                                                                 |                                                           |                                                               |                                                   |                                                         |                                                        |                                      |                                                             |                                                                            |
| <b><u>What is your ethnicity?</u></b>                       | <table border="0"> <tr> <td>1. White - British <input type="checkbox"/></td> <td>9. Asian or Asian British - Pakistani <input type="checkbox"/></td> </tr> <tr> <td>2. White - Irish <input type="checkbox"/></td> <td>10. Asian or Asian British - Bangladeshi <input type="checkbox"/></td> </tr> <tr> <td>3. Any other white background <input type="checkbox"/></td> <td>11. Any Other Asian Background <input type="checkbox"/></td> </tr> <tr> <td>4. Mixed – White &amp; Black Caribbean <input type="checkbox"/></td> <td>12. Black or Black British - Caribbean <input type="checkbox"/></td> </tr> <tr> <td>5. Mixed – White &amp; Black African <input type="checkbox"/></td> <td>13. Black or Black British - African <input type="checkbox"/></td> </tr> <tr> <td>6. Mixed – White &amp; Asian <input type="checkbox"/></td> <td>14. Any Other Black background <input type="checkbox"/></td> </tr> <tr> <td>7. Any other mixed background <input type="checkbox"/></td> <td>15. Chinese <input type="checkbox"/></td> </tr> <tr> <td>8. Asian or Asian British - Indian <input type="checkbox"/></td> <td>16. Any other ethnic group (please specify) <input type="checkbox"/> _____</td> </tr> </table> |                                    | 1. White - British <input type="checkbox"/> | 9. Asian or Asian British - Pakistani <input type="checkbox"/> | 2. White - Irish <input type="checkbox"/> | 10. Asian or Asian British - Bangladeshi <input type="checkbox"/> | 3. Any other white background <input type="checkbox"/> | 11. Any Other Asian Background <input type="checkbox"/> | 4. Mixed – White & Black Caribbean <input type="checkbox"/> | 12. Black or Black British - Caribbean <input type="checkbox"/> | 5. Mixed – White & Black African <input type="checkbox"/> | 13. Black or Black British - African <input type="checkbox"/> | 6. Mixed – White & Asian <input type="checkbox"/> | 14. Any Other Black background <input type="checkbox"/> | 7. Any other mixed background <input type="checkbox"/> | 15. Chinese <input type="checkbox"/> | 8. Asian or Asian British - Indian <input type="checkbox"/> | 16. Any other ethnic group (please specify) <input type="checkbox"/> _____ |
| 1. White - British <input type="checkbox"/>                 | 9. Asian or Asian British - Pakistani <input type="checkbox"/>                                                                                                                                                                                                                                                                                                                                                                                                                                                                                                                                                                                                                                                                                                                                                                                                                                                                                                                                                                                                                                                                                                                                                         |                                    |                                             |                                                                |                                           |                                                                   |                                                        |                                                         |                                                             |                                                                 |                                                           |                                                               |                                                   |                                                         |                                                        |                                      |                                                             |                                                                            |
| 2. White - Irish <input type="checkbox"/>                   | 10. Asian or Asian British - Bangladeshi <input type="checkbox"/>                                                                                                                                                                                                                                                                                                                                                                                                                                                                                                                                                                                                                                                                                                                                                                                                                                                                                                                                                                                                                                                                                                                                                      |                                    |                                             |                                                                |                                           |                                                                   |                                                        |                                                         |                                                             |                                                                 |                                                           |                                                               |                                                   |                                                         |                                                        |                                      |                                                             |                                                                            |
| 3. Any other white background <input type="checkbox"/>      | 11. Any Other Asian Background <input type="checkbox"/>                                                                                                                                                                                                                                                                                                                                                                                                                                                                                                                                                                                                                                                                                                                                                                                                                                                                                                                                                                                                                                                                                                                                                                |                                    |                                             |                                                                |                                           |                                                                   |                                                        |                                                         |                                                             |                                                                 |                                                           |                                                               |                                                   |                                                         |                                                        |                                      |                                                             |                                                                            |
| 4. Mixed – White & Black Caribbean <input type="checkbox"/> | 12. Black or Black British - Caribbean <input type="checkbox"/>                                                                                                                                                                                                                                                                                                                                                                                                                                                                                                                                                                                                                                                                                                                                                                                                                                                                                                                                                                                                                                                                                                                                                        |                                    |                                             |                                                                |                                           |                                                                   |                                                        |                                                         |                                                             |                                                                 |                                                           |                                                               |                                                   |                                                         |                                                        |                                      |                                                             |                                                                            |
| 5. Mixed – White & Black African <input type="checkbox"/>   | 13. Black or Black British - African <input type="checkbox"/>                                                                                                                                                                                                                                                                                                                                                                                                                                                                                                                                                                                                                                                                                                                                                                                                                                                                                                                                                                                                                                                                                                                                                          |                                    |                                             |                                                                |                                           |                                                                   |                                                        |                                                         |                                                             |                                                                 |                                                           |                                                               |                                                   |                                                         |                                                        |                                      |                                                             |                                                                            |
| 6. Mixed – White & Asian <input type="checkbox"/>           | 14. Any Other Black background <input type="checkbox"/>                                                                                                                                                                                                                                                                                                                                                                                                                                                                                                                                                                                                                                                                                                                                                                                                                                                                                                                                                                                                                                                                                                                                                                |                                    |                                             |                                                                |                                           |                                                                   |                                                        |                                                         |                                                             |                                                                 |                                                           |                                                               |                                                   |                                                         |                                                        |                                      |                                                             |                                                                            |
| 7. Any other mixed background <input type="checkbox"/>      | 15. Chinese <input type="checkbox"/>                                                                                                                                                                                                                                                                                                                                                                                                                                                                                                                                                                                                                                                                                                                                                                                                                                                                                                                                                                                                                                                                                                                                                                                   |                                    |                                             |                                                                |                                           |                                                                   |                                                        |                                                         |                                                             |                                                                 |                                                           |                                                               |                                                   |                                                         |                                                        |                                      |                                                             |                                                                            |
| 8. Asian or Asian British - Indian <input type="checkbox"/> | 16. Any other ethnic group (please specify) <input type="checkbox"/> _____                                                                                                                                                                                                                                                                                                                                                                                                                                                                                                                                                                                                                                                                                                                                                                                                                                                                                                                                                                                                                                                                                                                                             |                                    |                                             |                                                                |                                           |                                                                   |                                                        |                                                         |                                                             |                                                                 |                                                           |                                                               |                                                   |                                                         |                                                        |                                      |                                                             |                                                                            |
| <b><u>Marital Status</u></b>                                | <table border="0"> <tr> <td>1. Single <input type="checkbox"/></td> <td>5. Co-habiting <input type="checkbox"/></td> </tr> <tr> <td>2. Married <input type="checkbox"/></td> <td>6. Civil partnership <input type="checkbox"/></td> </tr> </table>                                                                                                                                                                                                                                                                                                                                                                                                                                                                                                                                                                                                                                                                                                                                                                                                                                                                                                                                                                     |                                    | 1. Single <input type="checkbox"/>          | 5. Co-habiting <input type="checkbox"/>                        | 2. Married <input type="checkbox"/>       | 6. Civil partnership <input type="checkbox"/>                     |                                                        |                                                         |                                                             |                                                                 |                                                           |                                                               |                                                   |                                                         |                                                        |                                      |                                                             |                                                                            |
| 1. Single <input type="checkbox"/>                          | 5. Co-habiting <input type="checkbox"/>                                                                                                                                                                                                                                                                                                                                                                                                                                                                                                                                                                                                                                                                                                                                                                                                                                                                                                                                                                                                                                                                                                                                                                                |                                    |                                             |                                                                |                                           |                                                                   |                                                        |                                                         |                                                             |                                                                 |                                                           |                                                               |                                                   |                                                         |                                                        |                                      |                                                             |                                                                            |
| 2. Married <input type="checkbox"/>                         | 6. Civil partnership <input type="checkbox"/>                                                                                                                                                                                                                                                                                                                                                                                                                                                                                                                                                                                                                                                                                                                                                                                                                                                                                                                                                                                                                                                                                                                                                                          |                                    |                                             |                                                                |                                           |                                                                   |                                                        |                                                         |                                                             |                                                                 |                                                           |                                                               |                                                   |                                                         |                                                        |                                      |                                                             |                                                                            |



|                                                                       |                                                                       |                                                                                          |                                                                                                         |                                                                                                            |                                                                                                         |
|-----------------------------------------------------------------------|-----------------------------------------------------------------------|------------------------------------------------------------------------------------------|---------------------------------------------------------------------------------------------------------|------------------------------------------------------------------------------------------------------------|---------------------------------------------------------------------------------------------------------|
| <p>2. Fingolimod<br/>(Gilenya)</p>                                    | <p>1. Currently receiving this treatment <input type="checkbox"/></p> | <p>2. Have tried this treatment in the past but now stopped <input type="checkbox"/></p> | <p>3. I have knowledge of this treatment but have never been prescribed it <input type="checkbox"/></p> | <p>4. I have no knowledge of this treatment and have never been prescribed it <input type="checkbox"/></p> | <p>5. I am either on this treatment or placebo as part of a clinical trial <input type="checkbox"/></p> |
| <p>3 Alemtuzumab<br/>(Lemtrada)</p>                                   | <p>1. Currently receiving this treatment <input type="checkbox"/></p> | <p>2. Have tried this treatment in the past but now stopped <input type="checkbox"/></p> | <p>3. I have knowledge of this treatment but have never been prescribed it <input type="checkbox"/></p> | <p>4. I have no knowledge of this treatment and have never been prescribed it <input type="checkbox"/></p> | <p>5. I am either on this treatment or placebo as part of a clinical trial <input type="checkbox"/></p> |
| <p>4. Beta interferon<br/>(eg. Avonex, Rebif, Betaferon, Extavia)</p> | <p>1. Currently receiving this treatment <input type="checkbox"/></p> | <p>2. Have tried this treatment in the past but now stopped <input type="checkbox"/></p> | <p>3. I have knowledge of this treatment but have never been prescribed it <input type="checkbox"/></p> | <p>4. I have no knowledge of this treatment and have never been prescribed it <input type="checkbox"/></p> | <p>5. I am either on this treatment or placebo as part of a clinical trial <input type="checkbox"/></p> |
| <p>5. Dimethyl Fumarate<br/>(Tecfidera/BG-12)</p>                     | <p>1. Currently receiving this treatment <input type="checkbox"/></p> | <p>2. Have tried this treatment in the past but now stopped <input type="checkbox"/></p> | <p>3. I have knowledge of this treatment but have never been prescribed it <input type="checkbox"/></p> | <p>4. I have no knowledge of this treatment and have never been prescribed it <input type="checkbox"/></p> | <p>5. I am either on this treatment or placebo as part of a clinical trial <input type="checkbox"/></p> |

|                                  |                                                                |                                                                                   |                                                                                                  |                                                                                                     |                                                                                                  |
|----------------------------------|----------------------------------------------------------------|-----------------------------------------------------------------------------------|--------------------------------------------------------------------------------------------------|-----------------------------------------------------------------------------------------------------|--------------------------------------------------------------------------------------------------|
|                                  |                                                                |                                                                                   | prescribed it<br><input type="checkbox"/>                                                        | prescribed it<br><input type="checkbox"/>                                                           |                                                                                                  |
| 6. Glatiramer Acetate (Copaxone) | 1. Currently receiving this treatment <input type="checkbox"/> | 2. Have tried this treatment in the past but now stopped <input type="checkbox"/> | 3. I have knowledge of this treatment but have never been prescribed it <input type="checkbox"/> | 4. I have no knowledge of this treatment and have never been prescribed it <input type="checkbox"/> | 5. I am either on this treatment or placebo as part of a clinical trial <input type="checkbox"/> |
| 7. Teriflunomide (Aubagio)       | 1. Currently receiving this treatment <input type="checkbox"/> | 2. Have tried this treatment in the past but now stopped <input type="checkbox"/> | 3. I have knowledge of this treatment but have never been prescribed it <input type="checkbox"/> | 4. I have no knowledge of this treatment and have never been prescribed it <input type="checkbox"/> | 5. I am either on this treatment or placebo as part of a clinical trial <input type="checkbox"/> |
| 8. Laquinimod                    | 1. Currently receiving this treatment <input type="checkbox"/> | 2. Have tried this treatment in the past but now stopped <input type="checkbox"/> | 3. I have knowledge of this treatment but have never been prescribed it <input type="checkbox"/> | 4. I have no knowledge of this treatment and have never been prescribed it <input type="checkbox"/> | 5. I am either on this treatment or placebo as part of a clinical trial <input type="checkbox"/> |
| 9. Stem Cells                    | 1. Currently receiving this treatment <input type="checkbox"/> | 2. Have tried this treatment in the past but                                      | 3. I have knowledge of this treatment but have                                                   | 4. I have no knowledge of this treatment and have                                                   | 5. I am either on this treatment or placebo as                                                   |

|                                             |                                                                      |                                                                                               |                                                                                                                    |                                                                                                                       |                                                                                                                 |
|---------------------------------------------|----------------------------------------------------------------------|-----------------------------------------------------------------------------------------------|--------------------------------------------------------------------------------------------------------------------|-----------------------------------------------------------------------------------------------------------------------|-----------------------------------------------------------------------------------------------------------------|
|                                             |                                                                      | now stopped<br><input type="checkbox"/>                                                       | never been<br>prescribed it<br><input type="checkbox"/>                                                            | never been<br>prescribed it<br><input type="checkbox"/>                                                               | part of a<br>clinical trial <input type="checkbox"/>                                                            |
| 10. Azathioprine                            | 1. Currently<br>receiving this<br>treatment <input type="checkbox"/> | 2. Have tried<br>this treatment<br>in the past but<br>now stopped<br><input type="checkbox"/> | 3. I have<br>knowledge of<br>this treatment<br>but have<br>never been<br>prescribed it<br><input type="checkbox"/> | 4. I have no<br>knowledge of<br>this treatment<br>and have<br>never been<br>prescribed it<br><input type="checkbox"/> | 5. I am either<br>on this<br>treatment or<br>placebo as<br>part of a<br>clinical trial <input type="checkbox"/> |
| 11. IVIg<br>(intravenous<br>innumoglobulin) | 1. Currently<br>receiving this<br>treatment <input type="checkbox"/> | 2. Have tried<br>this treatment<br>in the past but<br>now stopped<br><input type="checkbox"/> | 3. I have<br>knowledge of<br>this treatment<br>but have<br>never been<br>prescribed it<br><input type="checkbox"/> | 4. I have no<br>knowledge of<br>this treatment<br>and have<br>never been<br>prescribed it<br><input type="checkbox"/> | 5. I am either<br>on this<br>treatment or<br>placebo as<br>part of a<br>clinical trial <input type="checkbox"/> |
| 12. Mitoxantrone                            | 1. Currently<br>receiving this<br>treatment <input type="checkbox"/> | 2. Have tried<br>this treatment<br>in the past but<br>now stopped<br><input type="checkbox"/> | 3. I have<br>knowledge of<br>this treatment<br>but have<br>never been<br>prescribed it<br><input type="checkbox"/> | 4. I have no<br>knowledge of<br>this treatment<br>and have<br>never been<br>prescribed it<br><input type="checkbox"/> | 5. I am either<br>on this<br>treatment or<br>placebo as<br>part of a<br>clinical trial <input type="checkbox"/> |

|                                |                                                                |                                                                                   |                                                                                                  |                                                                                                     |                                                                                                  |
|--------------------------------|----------------------------------------------------------------|-----------------------------------------------------------------------------------|--------------------------------------------------------------------------------------------------|-----------------------------------------------------------------------------------------------------|--------------------------------------------------------------------------------------------------|
| 13.<br>Cyclophosphamide        | 1. Currently receiving this treatment <input type="checkbox"/> | 2. Have tried this treatment in the past but now stopped <input type="checkbox"/> | 3. I have knowledge of this treatment but have never been prescribed it <input type="checkbox"/> | 4. I have no knowledge of this treatment and have never been prescribed it <input type="checkbox"/> | 5. I am either on this treatment or placebo as part of a clinical trial <input type="checkbox"/> |
| 14.<br>Zenapax<br>(Daclizumab) | 1. Currently receiving this treatment <input type="checkbox"/> | 2. Have tried this treatment in the past but now stopped <input type="checkbox"/> | 3. I have knowledge of this treatment but have never been prescribed it <input type="checkbox"/> | 4. I have no knowledge of this treatment and have never been prescribed it <input type="checkbox"/> | 5. I am either on this treatment or placebo as part of a clinical trial <input type="checkbox"/> |
| 15.<br>Ocrelizumab             | 1. Currently receiving this treatment <input type="checkbox"/> | 2. Have tried this treatment in the past but now stopped <input type="checkbox"/> | 3. I have knowledge of this treatment but have never been prescribed it <input type="checkbox"/> | 4. I have no knowledge of this treatment and have never been prescribed it <input type="checkbox"/> | 5. I am either on this treatment or placebo as part of a clinical trial <input type="checkbox"/> |

### 1.3 Treatment Status

Question asked: 'With reference to treatment, which of the following options best reflects your *current* situation?'

Please tick one box.

|                                                                           |                                                                             |                                                                                |                                                                            |
|---------------------------------------------------------------------------|-----------------------------------------------------------------------------|--------------------------------------------------------------------------------|----------------------------------------------------------------------------|
| 1. Satisfied to continue with existing treatment <input type="checkbox"/> | 2. On treatment but considering a treatment switch <input type="checkbox"/> | 3. Not on treatment but considering treatment options <input type="checkbox"/> | 4. Not on treatment and not considering treatment <input type="checkbox"/> |
|---------------------------------------------------------------------------|-----------------------------------------------------------------------------|--------------------------------------------------------------------------------|----------------------------------------------------------------------------|

#### 1.4 DC (SURE scale)

Further to the answer you gave (above) referencing treatment choice:

|                                                                     |                                 |                                |
|---------------------------------------------------------------------|---------------------------------|--------------------------------|
| 1. Do you feel sure about the best choice for you?                  | 1. Yes <input type="checkbox"/> | 2. No <input type="checkbox"/> |
| 2. Do you know the benefits and risks of each option?               | 1. Yes <input type="checkbox"/> | 2. No <input type="checkbox"/> |
| 3. Are you clear about which benefits and risks matter most to you? | 1. Yes <input type="checkbox"/> | 2. No <input type="checkbox"/> |
| 4. Do you have enough support and advice to make a choice?          | 1. Yes <input type="checkbox"/> | 2. No <input type="checkbox"/> |

#### 1.5 Decisional Regret Scale

Based upon your current treatment status (even if you are not on treatment), please show how you feel about these statements by selecting a single options from each row of statements below:

|                                      |                                           |                                  |                                                       |                                     |                                              |
|--------------------------------------|-------------------------------------------|----------------------------------|-------------------------------------------------------|-------------------------------------|----------------------------------------------|
| 1. It was the right decision         | 1 Strongly Agree <input type="checkbox"/> | 2 Agree <input type="checkbox"/> | 3 Neither Agree Nor Disagree <input type="checkbox"/> | 4 Disagree <input type="checkbox"/> | 5 Strongly Disagree <input type="checkbox"/> |
| 2. I regret the choice that was made | 1 Strongly Agree <input type="checkbox"/> | 2 Agree <input type="checkbox"/> | 3 Neither Agree Nor Disagree <input type="checkbox"/> | 4 Disagree <input type="checkbox"/> | 5 Strongly Disagree <input type="checkbox"/> |

|                                                                |                                           |                                  |                                                       |                                     |                                              |
|----------------------------------------------------------------|-------------------------------------------|----------------------------------|-------------------------------------------------------|-------------------------------------|----------------------------------------------|
| 3. I would go for the same choice if I had to do it over again | 1 Strongly Agree <input type="checkbox"/> | 2 Agree <input type="checkbox"/> | 3 Neither Agree Nor Disagree <input type="checkbox"/> | 4 Disagree <input type="checkbox"/> | 5 Strongly Disagree <input type="checkbox"/> |
| 4. The choice did me a lot of harm                             | 1 Strongly Agree <input type="checkbox"/> | 2 Agree <input type="checkbox"/> | 3 Neither Agree Nor Disagree <input type="checkbox"/> | 4 Disagree <input type="checkbox"/> | 5 Strongly Disagree <input type="checkbox"/> |
| 5. The decision was a wise one                                 | 1 Strongly Agree <input type="checkbox"/> | 2 Agree <input type="checkbox"/> | 3 Neither Agree Nor Disagree <input type="checkbox"/> | 4 Disagree <input type="checkbox"/> | 5 Strongly Disagree <input type="checkbox"/> |

### 1.6 Control Preference Scale

Which of the following scenarios best fits how you would usually reach a decision about treatment either now or in the past?

A -  B -  C -  D -  E -



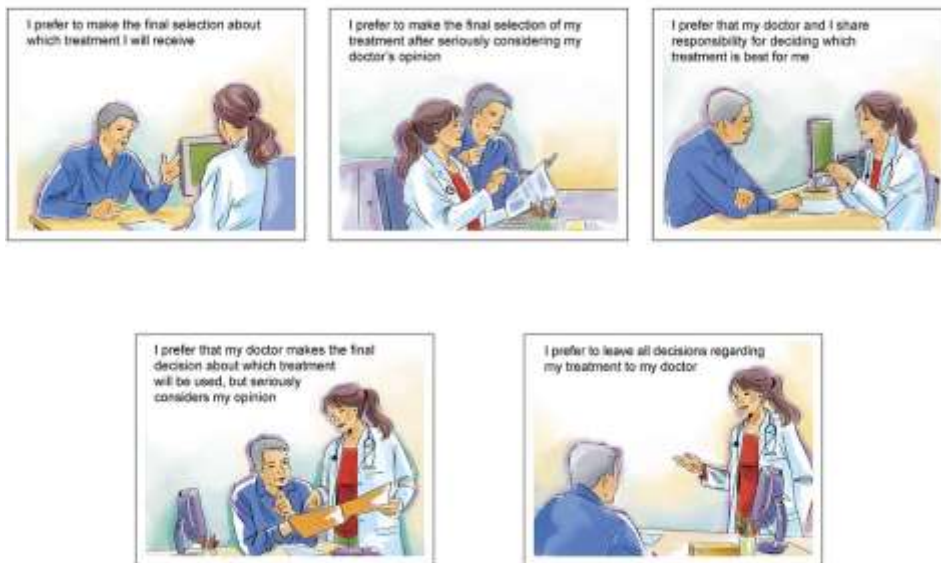

This marks the end of the questionnaire. Please kindly double-check that you have answered every question as described.

Once again, thank you for taking the time to complete the research.

## **References**

Légaré F, Kearing S, Clay K, Gagnon S, D'Amours D, Rousseau M, O'Connor AM. Are you SURE? Assessing patient decisional conflict with a 4-item screening test. *Can Fam Physician* 2010; 56:e308-314.

O'Connor AM. User Manual – Decision Regret Scale [document on the Internet]. Ottawa: Ottawa Hospital Research Institute; © 1996 [modified 2003; cited 2014]. 3 p. Available from [http://decisionaid.ohri.ca/docs/develop/User\\_Manuals/UM\\_Regret\\_Scale.pdf](http://decisionaid.ohri.ca/docs/develop/User_Manuals/UM_Regret_Scale.pdf)

Solari A, Giordano A, Kasper J, Drulovic J, van Nunen A, et al. (2013) Role Preferences of People with Multiple Sclerosis: Image-Revised, Computerized Self-Administered Version of the Control Preference Scale. *PLoS ONE* 8(6): e66127. doi:10.1371/journal.pone.0066127

GIORDANO, A., MATTAROZZI, K., PUCCI, E., LEONE, M., CASINI, F., COLLIMEDAGLIA, L. & SOLARI, A. 2008. Participation in medical decision-making: Attitudes of Italians with multiple sclerosis. *Journal of the Neurological Sciences*, 275, 86-91.

HEESEN, C., KASPER, J., SEGAL, J., KOPKE, S. & MUHLHAUSER, I. 2004. Decisional role preferences, risk knowledge and information interests in patients with multiple sclerosis. *Mult Scler*, 10, 643-50.
